# Supplementary material for: Evolution of Highly Biocompatible and Thermally Stable YVO4:Er3+/Yb3+ Upconversion Mesoporous Hollow Nanospheriods as Drug Carriers for Therapeutic Applications
Source: MDPI journal article supplement (doi:10.3390/nano12152520), 2022-07-22
Supplement: s1 [file s1]

# Evolution of Highly Biocompatible and Thermally Stable YVO<sub>4</sub>:Er<sup>3+</sup>/Yb<sup>3+</sup> Upconversion Mesoporous Hollow Nanospheriods as Drug Carriers for Therapeutic Applications

Eluri Pavitra <sup>1</sup>, Hoomin Lee <sup>1</sup>, Seung Kyu Hwang <sup>1</sup>, Jin Young Park <sup>2</sup>, Young-Kyu Han <sup>3</sup>, Ganji Seeta Rama Raju <sup>3,\*</sup> and Yun Suk Huh <sup>1,\*</sup>

<sup>1</sup> Department of Biological Engineering, Biohybrid Systems Research Center (BSRC), Inha University, Incheon 22212, Korea; pavitra@inha.ac.kr (E.P.); hmlee8907@inha.ac.kr (H.L.); 22152213@inha.edu (S.K.H.)

<sup>2</sup> Department of Electrical, Electronics and Software Engineering, Pukyong National University, Yongdang Campus, Busan 48547, Korea; pjy0329@pknu.ac.kr

<sup>3</sup> Department of Energy and Materials Engineering, Dongguk University-Seoul, Seoul 04620, Korea; ykenery@dongguk.edu

\* Correspondence: gseetaramaraju7@dongguk.edu or gseetaramaraju@live.in (G.S.R.R.); yunsuk.huh@inha.ac.kr (Y.S.H.)

## Characterizations:

The morphological studies were carried using field-emission scanning electron microscopy (FE-SEM) (Hitachi-SU8010, Japan) and the field-emission transmission electron microscopy (FE-TEM: JEM-2100F/JEOL) measurements. The X-ray diffraction (XRD) patterns of YC:Er<sup>3+</sup>/Yb<sup>3+</sup> NSs and YVO<sub>4</sub>:Er<sup>3+</sup>/Yb<sup>3+</sup> UC-MHNSPs were measured using X'Pert Pro MRD system (PANalytical) with ceramic Cu target (CuK $\alpha$ = 1.5406 Å), X-ray generator of 3kW 60kV/60mA, and scan speed of 1 deg/sec. The elemental composition was tested using energy dispersive X-ray spectrometer attached to FE-SEM instrument (PANalytical Holland). Nitrogen adsorption/desorption analysis of UC-MHNSPs were measured using Specific Surface Analyzer (3Flex) system. The UC emission spectra were recorded using a 980 nm continuous wave laser diode (1W) as the pumping source (Model No.: PSU-III-LED, Input: 85~264VAC 47~63Hz 2A, Changchun new industries, Optoelectronics Tech. Co. LTD) and detected by Ocean Optics software. The Zeta potential of YVO<sub>4</sub>:Er<sup>3+</sup>/Yb<sup>3+</sup> UC-MHNSPs were measured by Zeta Potential Analyzer (ELS-Z) system with voltage current range of 0 to 50 mA. For Zeta potential measurement, flow cell was used with water as diluent. The in vitro imaging was captured using an inverted fluorescence microscope (Olympus CKX53).

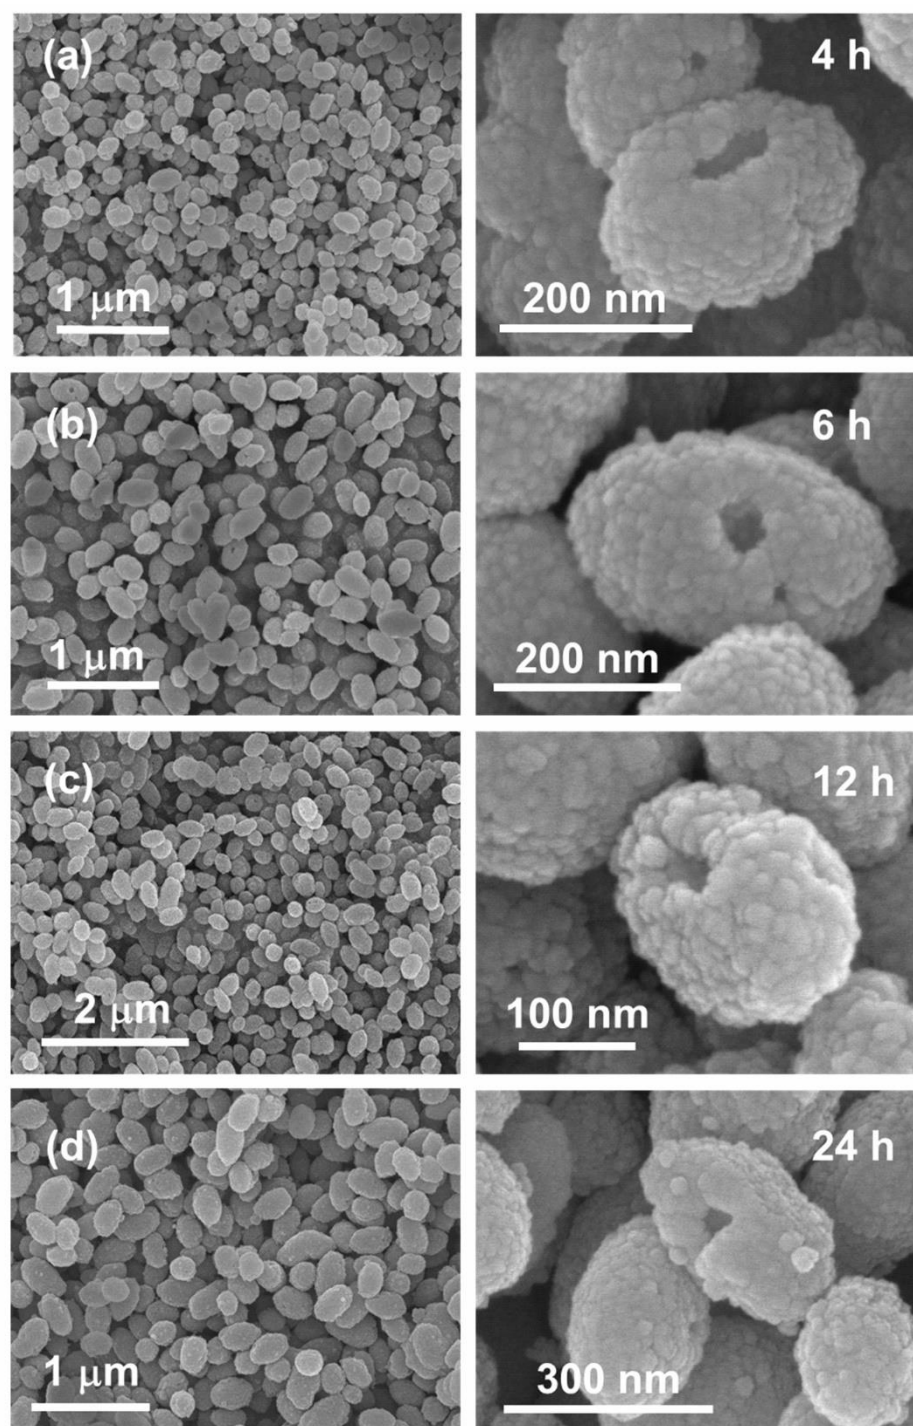

**Figure S1.** FE-SEM images of  $\text{YVO}_4:\text{Er}^{3+}/\text{Yb}^{3+}$  UC-MHNPs at different reaction timings of (a) 4 h, (b) 6 h, (c) 12 h, (d) 24 h respectively.

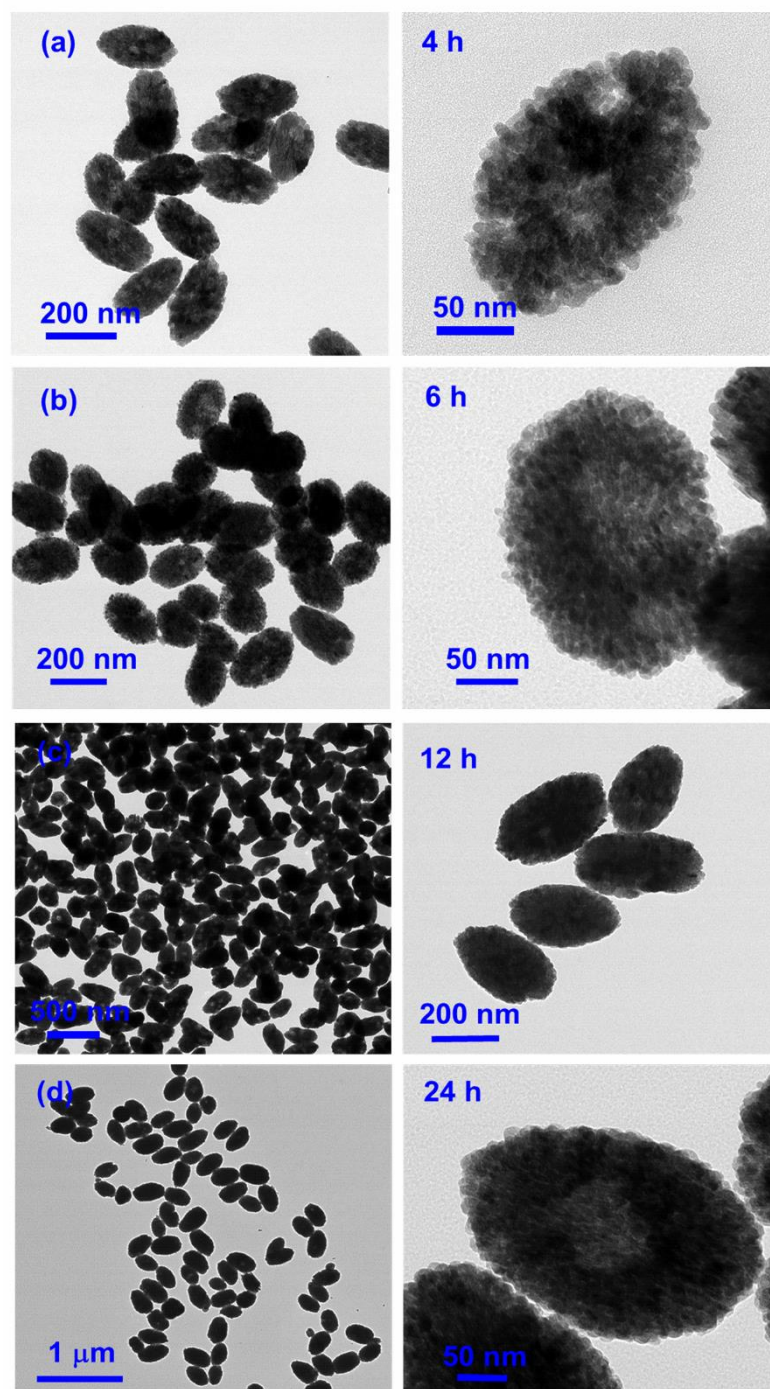

**Figure S2.** FE- TEM images of YVO<sub>4</sub>:Er<sup>3+</sup>/Yb<sup>3+</sup> UC-MHNSPs at different reaction timings of (a) 4 h, (b) 6 h, (c) 12 h, (d) 24 h respectively.

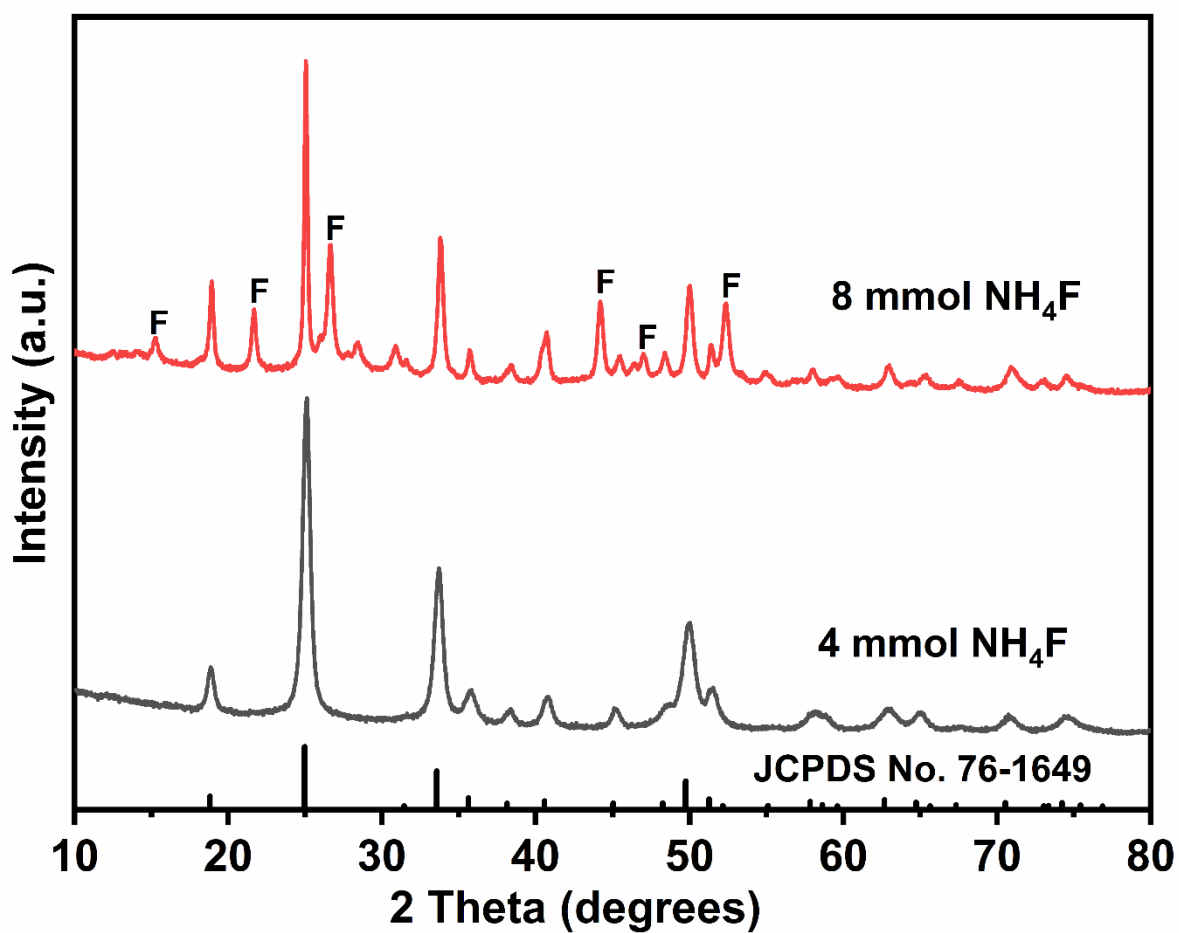

**Figure S3.** XRD patterns of YVO<sub>4</sub>:Er<sup>3+</sup>/Yb<sup>3+</sup> UC-MHNPs with two different concentrations of NH<sub>4</sub>F flux.

**Table S1.** Atomic parameters, occupancy, and atomic displacement parameters ( $U_{iso}$  [Å<sup>2</sup>]) of YVO<sub>4</sub>:Er<sup>3+</sup>/Yb<sup>3+</sup> UC-MHNPs. .

| Atoms | Wyckoff | x/a     | y/b      | z/c      | Occupancy | $U[Å^2]$ |
|-------|---------|---------|----------|----------|-----------|----------|
| Y     | 8 c     | 0.00000 | 0.75000  | 0.12500  | 0.8900    | 0.00883  |
| Er    | 8 c     | 0.00000 | 0.75000  | 0.12500  | 0.0100    | 0.03343  |
| Yb    | 8 c     | 0.00000 | 0.75000  | 0.12500  | 0.1000    | 0.49316  |
| V     | 16 h    | 0.00000 | 0.25000  | 0.37500  | 1.0000    | 0.02598  |
| O     | 16 h    | 0.00000 | 0.073426 | 0.192788 | 1.0000    | 0.00438  |
